# Supplementary material for: Tetrakis(4-sulfophenyl)methane dodecahydrate. Reversible and selective water inclusion and release in an organic host
Source: Royal Society of Chemistry journal article supplement (doi:10.1039/b706194c), 2007-01-01
Supplement: b706194c.pdf [file b706194c.pdf]

Electronic Supplementary Information (ESI)

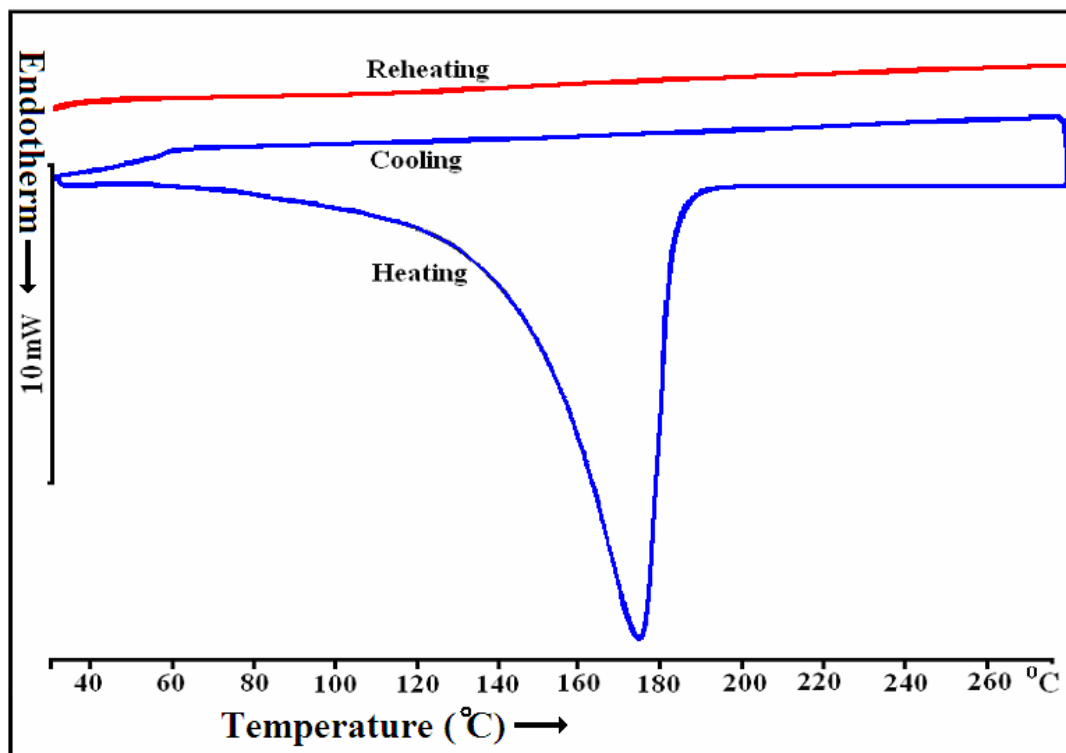

**Figure S1** Differential scanning calorimetry. A heat–cool–heat cycle of TPM-SO<sub>3</sub>H·(H<sub>2</sub>O)<sub>12</sub> (sample dried at 150 °C/ 0.5 Torr) shows complete loss of water below 200 °C and no weight loss in the second heating cycle.

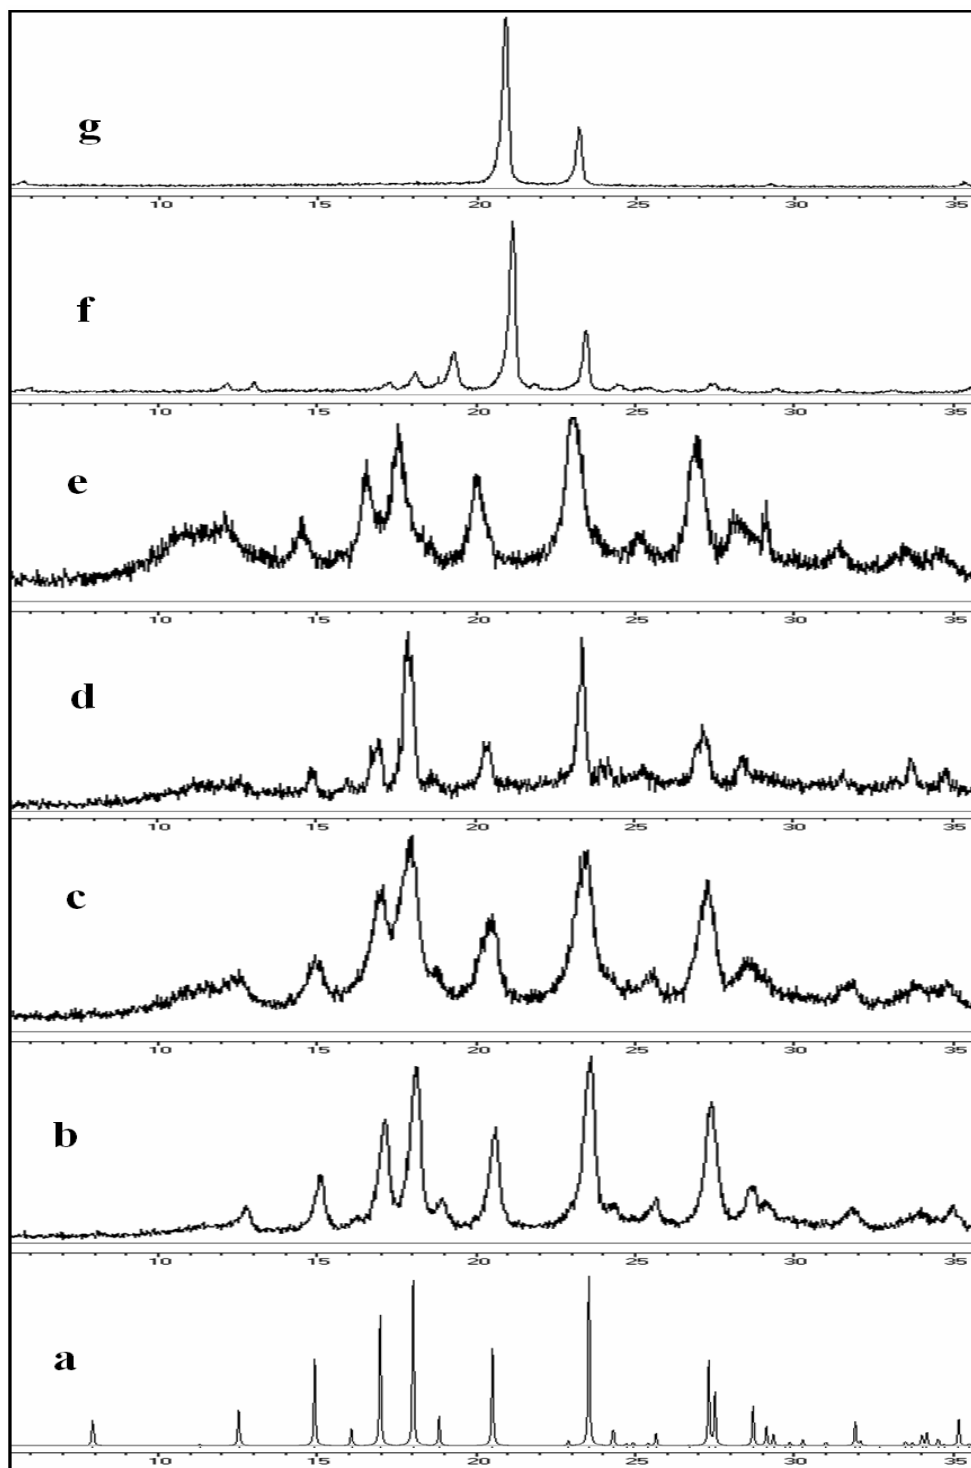

**Figure S2:** Powder X-ray diffraction pattern of TPM-SO<sub>3</sub>H·(H<sub>2</sub>O)<sub>12</sub> under different dehydration conditions. (a) TPM-SO<sub>3</sub>H·(H<sub>2</sub>O)<sub>12</sub>. Simulated from the X-ray crystal structure. (b) Dodecahydrate host material. (c-e) Dried sample at 100, 200, 250 °C/ 0.5 Torr. There is little change in the powder lines due to immediate re-absorption of water

by the apohost during sample handling and data collection. The amorphous content varies after heat-cool cycles. (f) The solid was immediately coated with wax after heating at 200 °C/ 0.5 Torr. (g) Reference wax. The powder diffraction lines in profiles (b-e) are similar. The new crystalline phase in (f) is possibly the anhydrous form.

**Table S1:** O···O and O···H distances in H bonds calculated using PLATON.

| Interaction | Distance /Å            |           |
|-------------|------------------------|-----------|
|             | < $\Sigma$ vdW = 3.0 Å | 3.0-4.0 Å |
| O1A···O5    | 2.810(12)              |           |
| O1A···H6    | 2.48(4)                |           |
| O1B···O5    |                        | 3.842(8)  |
| O1B···O6B   | 2.39(3)                |           |
| O1B···O2    |                        | 3.838(8)  |
| O1B···O5    |                        | 3.306(9)  |
| O1B···O6B   |                        | 3.40(3)   |
| O1B···H6    |                        | 3.39(4)   |
| O1B···O6A   | 2.60(2)                |           |
| O1B···O6B   | 2.89(2)                |           |
| O2···O5     |                        | 3.468(6)  |
| O2···H6     | 2.60(4)                |           |
| O2···O4     | 2.716(6)               |           |
| O3···O4     | 2.697(6)               |           |
| O3···O5     | 2.729(6)               |           |
| O3···O6A    |                        | 3.66(2)   |
| O3···O6B    |                        | 3.81(3)   |
| O3···H3     | 2.67(4)                |           |
| O6A···O5    | 2.71(2)                |           |
| O6A···H6    |                        | 3.37(5)   |
| O6A···O6B   | 2.74(4)                |           |
| O6B···O2    |                        | 3.74(2)   |
| O6B···O5    | 2.58(2)                |           |
| O6B···O6A   | 2.74(4)                |           |
| O6B···O6A   |                        | 3.34(4)   |
| O6B···H6    |                        | 3.11(5)   |

C–H···O distances (neutron-normalized C–H = 1.083 Å).

| Interaction | H···O/Å | C···O/ Å | $\angle$ C–H···O/° |
|-------------|---------|----------|--------------------|
| C3–H3···O3  | 2.50    | 3.467(6) | 147                |
| C5–H5···O5  | 2.70    | 3.460(6) | 126                |
| C5–H5···O4  | 2.94    | 3.669(6) | 124                |
| C6–H6···O2  | 2.54    | 3.342(6) | 129                |

**The Cambridge Structural Database** (version 5.27, ConQuest 1.9, Jan 2007 update) was searched to obtain results reported in Table S2 and S3. Crystal structures were visualized in Mercury 1.4.1.

**Table S2:** Free volume in the host molecule (from tetrahedral moiety) for solvent inclusion and solvent occupied volume in the crystal structure were calculated in PLATON. Organic crystal structures having no disorder, no errors, not polymeric, and 3D coordinates determined were retrieved. Refcodes are arranged in decreasing order of free volume for solvent inclusion. TPM-SO<sub>3</sub>H is highlighted in bold.

| Refcode        | Free vol. for solvent inclusion | Solvent occupied volume | Refcode | Free vol. for solvent inclusion | Solvent occupied volume |
|----------------|---------------------------------|-------------------------|---------|---------------------------------|-------------------------|
| XUVBEV         | 65.94                           | -                       | DEKTOC  | 43.26                           | 14.66                   |
| XUVBAR         | 63.75                           | -                       | QOWDIP  | 42.35                           | 13.74                   |
| VOJFEF         | 61.88                           | 29.71                   | UJOFEE  | 41.43                           | 15.34                   |
| QOWDAH         | 57.49                           | 27.17                   | XOGJEI  | 40.91                           | 12.18                   |
| LASVEH         | 55.96                           | 24.46                   | KAPGAK  | 40.88                           | 9.20                    |
| EVEMOH         | 54.61                           | 27.17                   | NUJKIM  | 40.06                           | 10.38                   |
| EGILAH         | 53.17                           | 11.54                   | OGENUJ  | 39.81                           | 11.21                   |
| OMADOV         | 51.67                           | 23.52                   | XECWOS  | 39.06                           | 4.32                    |
| LOJRAD         | 49.90                           | 18.44                   | DAHAW   | 38.48                           | 3.58                    |
| XOVLID         | 48.98                           | 22.20                   | LOJQUW  | 37.98                           | 9.54                    |
| ZADROL         | 48.87                           | -                       | QOVZUW  | 37.78                           | 10.38                   |
| BONBEL         | 48.50                           | 22.50                   | NAWSOU  | 37.06                           | 10.43                   |
| TAHHAL         | 47.75                           | 20.16                   | DEKTUI  | 36.97                           | 4.91                    |
| XOVLAV         | 47.61                           | 19.90                   | RARRIM  | 36.88                           | 9.51                    |
| NUJKEI         | 47.38                           | 17.04                   | QOLMOT  | 36.78                           | 6.04                    |
| XEBTIH         | 47.23                           | 17.31                   | EVEBAI  | 36.62                           | 8.51                    |
| EVEMUN         | 46.90                           | 13.14                   | QOWBAF  | 36.19                           | 7.93                    |
| <b>TPMSO3H</b> | <b>46.50</b>                    | <b>19.10</b>            | LONDUT  | 35.77                           | 4.94                    |
| BEQFIN         | 46.30                           | 12.30                   | ABUCUV  | 35.40                           | 7.97                    |
| XOGJAE         | 46.05                           | 13.72                   | QOWBEJ  | 34.22                           | 10.43                   |
| HEXXAJ         | 45.69                           | 17.48                   | FEWDOB  | 33.49                           | 10.08                   |
| WANGAU         | 45.14                           | 18.01                   | QOWCOU  | 32.22                           | 4.22                    |
| FOMKUO         | 44.89                           | 15.14                   | QOWCIO  | 31.04                           | 4.24                    |
| BAGBAM         | 43.50                           | 14.01                   |         |                                 |                         |

**Table S3:** List of CSD refcodes of dodecahydrate crystal structures (32 hits). There are 16 ordered structures and remaining 16 structures are disordered. There are 6 structures with all hydrogen atoms (including those of water) located. Organic crystal structures with the 'All Text phrase' 'dodecahydrate' and having *R*-factor < 0.10, no disorder, no error, not polymeric, and 3D coordinate determined were retrieved. The lower *R*-factor structure was retained for duplicate refcodes.

| Refcode  | Space Group  | Temperature / K | Ordered structure (Yes/No) | Water Hs located (Yes/No) |
|----------|--------------|-----------------|----------------------------|---------------------------|
| ACTDGU10 | $P2_12_12_1$ | 295             | No                         | No                        |
| AGAZOX   | $P1$         | 298             | No                         | No                        |
| ARACEB   | $P1$         | 150             | No                         | No                        |
| BCDEXD10 | $P2_1$       | 295             | No                         | No                        |
| EDOJOW   | $P2_1/c$     | 100             | No                         | No                        |
| GOSQOU   | $C2$         | 295             | No                         | No                        |
| HIFKEM   | $P2_1$       | 295             | Yes                        | Yes                       |
| IJOLUO   | $C2$         | 293             | No                         | No                        |
| IQOZIX   | $P2_12_12_1$ | 150             | No                         | No                        |
| JOSTOA   | $P-1$        | 295             | Yes                        | Yes                       |
| KAFPEN   | $P1$         | 123             | Yes                        | No                        |
| KUTKOZ   | $P2_1$       | 295             | No                         | No                        |
| LEDRUH   | $P2_12_12_1$ | 295             | No                         | No                        |
| LOZMUI   | $C2/c$       | 90              | Yes                        | One H located             |
| LOZNAP   | $C2/c$       | 153             | Yes                        | One H located             |
| LOZNET   | $C2/c$       | 90              | Yes                        | One H located             |
| LOZNIX   | $C2/c$       | 93              | Yes                        | Yes                       |
| LOZNOD   | $C2/c$       | 86              | Yes                        | One H located             |
| LOZNUJ   | $C2/c$       | 93              | Yes                        | One H located             |
| MORSAN   | $P-1$        | 100             | Yes                        | Yes                       |
| NOJPAD   | $P2_12_12_1$ | 295             | No                         | No                        |
| NUKFII   | $Aba2$       | 295             | No                         | No                        |
| OGIZIN   | $P2_12_12_1$ | 293             | No                         | No                        |
| PAANTD01 | $P2_12_12$   | 295             | No                         | No                        |
| PEZNAJ   | $P2_12_12_1$ | 193             | Yes                        | Yes                       |
| POXKIW   | $P-1$        | 295             | Yes                        | No                        |
| REGRIE   | $P2_1/n$     | 123             | No                         | No                        |
| SAFJEO10 | $P-1$        | 295             | Yes                        | No                        |
| XIVWAA   | $P2_1$       | 173             | Yes                        | No                        |
| XUSBOC   | $P2/c$       | 123             | Yes                        | Yes                       |
| ZUWQEN   | $P2_1$       | 295             | Yes                        | No                        |
| QENTIN   | $P2_1$       | 200             | No                         | No                        |
